# Supplementary material for: Anxiety and depression in cancer patients and survivors in the context of restrictions in contact and oncological care during the COVID‐19 pandemic
Source: PubMed Central journal article supplement — Int J Cancer. 2024 Oct 3;156(4):711–22. doi: 10.1002/ijc.35204 (PMC11661517; doi:10.1002/ijc.35204), 2024-10-03
Supplement: IJC-156-711-s001.pdf [file IJC-156-711-s001.pdf]

# **Anxiety and depression in cancer patients and survivors in the context of restrictions in contact and oncological care during the COVID-19 pandemic**

Daniela Doege, Julien Frick, Rachel D. Eckford, Lena-Koch-Gallenkamp, Michael Schlander, Baden-Württemberg Cancer Registry & Volker Arndt

## **Supplementary material**

### Table of contents

|                                                                                                                                                                                                      |    |
|------------------------------------------------------------------------------------------------------------------------------------------------------------------------------------------------------|----|
| Table S1. Comparison of non-respondents and respondents.....                                                                                                                                         | 2  |
| Table S2. Changes in domains of oncological care.....                                                                                                                                                | 3  |
| Table S3. Prevalence of anxiety and depression in cancer patients and survivors, overall and stratified by change of active cancer treatment. ....                                                   | 4  |
| Table S4. Odds Ratios and 95% CI for factors explaining anxiety. ....                                                                                                                                | 5  |
| Table S5. Odds Ratios and 95% CI for factors explaining depression. ....                                                                                                                             | 7  |
| Table S6. Prevalence of anxiety and depression in cancer patients and survivors with a change in active cancer treatment, stratified by decision-maker, domain of change, and reason for change..... | 9  |
| Figure S1. Flowchart of the study.....                                                                                                                                                               | 10 |
| Figure S2. Odds ratios for anxiety (HADS-A cut-off $\geq 11$ ).....                                                                                                                                  | 11 |
| Figure S3. Odds ratios for depression (HADS-D cut-off $\geq 11$ ).....                                                                                                                               | 12 |

Table S1. Comparison of non-respondents and respondents.

|                                 | Non-respondents <sup>a</sup> |                   | Respondents <sup>b</sup> |                   | Difference   | <i>p</i> <sub>diff</sub> |
|---------------------------------|------------------------------|-------------------|--------------------------|-------------------|--------------|--------------------------|
|                                 | n                            | col% <sup>c</sup> | n                        | col% <sup>c</sup> | col%         | <i>p</i> ( $\chi^2$ )    |
| <b>Total</b>                    | 10728                        | 100               | 2435                     | 100               |              |                          |
| <b>Sex</b>                      |                              |                   |                          |                   |              |                          |
| male                            | 5252                         | 49.0              | 1186                     | 48.7              | -0.3         | 0.8239                   |
| female                          | 5476                         | 51.0              | 1249                     | 51.3              | 0.3          |                          |
| <b>Age at survey</b>            |                              |                   |                          |                   |              |                          |
| ≤49 years                       | 784                          | 7.3               | 189                      | 7.8               | 0.5          | <.0001                   |
| 50-59 years                     | 1489                         | 13.9              | 460                      | 18.9              | 5.0          |                          |
| 60-69 years                     | 3028                         | 28.2              | 781                      | 32.1              | 3.9          |                          |
| 70-79 years                     | 3262                         | 30.4              | 741                      | 30.4              | 0.0          |                          |
| ≥80 years                       | 2165                         | 20.2              | 264                      | 10.8              | -9.4         |                          |
| <b>Age at diagnosis</b>         |                              |                   |                          |                   |              |                          |
| ≤49 years                       | 964                          | 9.0               | 253                      | 10.4              | 1.4          | <.0001                   |
| 50-59 years                     | 1852                         | 17.3              | 574                      | 23.6              | 6.3          |                          |
| 60-69 years                     | 3187                         | 29.7              | 794                      | 32.6              | 2.9          |                          |
| 70-79 years                     | 3421                         | 31.9              | 670                      | 27.5              | -4.4         |                          |
| ≥80 years                       | 1304                         | 12.2              | 144                      | 5.9               | -6.3         |                          |
| <b>Year of diagnosis</b>        |                              |                   |                          |                   |              |                          |
| 2015                            | 166                          | 1.5               | 26                       | 1.1               | -0.4         | 0.0392                   |
| 2016                            | 425                          | 4.0               | 79                       | 3.2               | -0.8         |                          |
| 2017                            | 426                          | 4.0               | 102                      | 4.2               | 0.2          |                          |
| 2018                            | 1858                         | 17.3              | 379                      | 15.6              | -1.7         |                          |
| 2019                            | 4568                         | 42.6              | 1070                     | 43.9              | 1.3          |                          |
| 2020                            | 3285                         | 30.6              | 779                      | 32                | 1.4          |                          |
| <b>Tumor site</b>               |                              |                   |                          |                   |              |                          |
| Breast cancer                   | 875                          | 8.2               | 323                      | 13.3              | 5.1          | <.0001                   |
| Colorectal cancer               | 3271                         | 30.5              | 642                      | 26.4              | -4.1         |                          |
| Lung cancer                     | 3445                         | 32.1              | 533                      | 21.9              | -10.2        |                          |
| Prostate cancer                 | 863                          | 8.0               | 310                      | 12.7              | 4.7          |                          |
| Leukemia or lymphoma            | 2274                         | 21.2              | 627                      | 25.7              | 4.5          |                          |
| <b>Stage</b>                    |                              |                   |                          |                   |              |                          |
| I                               | 1786                         | 16.6              | 449                      | 18.4              | 1.8          | <.0001                   |
| II                              | 1577                         | 14.7              | 416                      | 17.1              | 2.4          |                          |
| III                             | 1612                         | 15.0              | 373                      | 15.3              | 0.3          |                          |
| IV                              | 1773                         | 16.5              | 285                      | 11.7              | -4.8         |                          |
| n.a. (leukemia/lymphoma)        | 2274                         | 21.2              | 627                      | 25.7              | 4.5          |                          |
| Missing                         | 1706                         | 15.9              | 285                      | 11.7              | -4.2         |                          |
|                                 | <b>Mean</b>                  | <b>SD</b>         | <b>Mean</b>              | <b>SD</b>         | <b>years</b> | <b><i>p</i> (t)</b>      |
| <b>Age at survey (years)</b>    | 68.1                         | 12.3              | 65.5                     | 11.8              | -2.6         | <.0001                   |
| <b>Age at diagnosis (years)</b> | 66.0                         | 12.4              | 63.5                     | 11.9              | -2.5         | <.0001                   |

Footnotes: <sup>a</sup>All potentially eligible cancer patients and survivors (excluding those who were deceased, who had a second cancer, or an invalid diagnosis at the time of the invitation). <sup>b</sup>Cancer patients and survivors who fulfilled the inclusion criteria and returned full-length questionnaire. N = 4 questionnaires could not be linked to the registry data and were used in the analysis but excluded from the respondents group in order not to count them double. <sup>c</sup>Column percentages might not add up to 100% due to rounding up of decimals. SD: Standard deviation. Bold *p* values mark statistically significant differences (*p* < .05) in global comparison.

Table S2. Changes in domains of oncological care.

|                  | Overall |                |                | Patients |                |                | Survivors |                |                | $p_a$            | $p_b$  |
|------------------|---------|----------------|----------------|----------|----------------|----------------|-----------|----------------|----------------|------------------|--------|
|                  | N       | % <sub>a</sub> | % <sub>b</sub> | N        | % <sub>a</sub> | % <sub>b</sub> | N         | % <sub>a</sub> | % <sub>b</sub> |                  |        |
| Any change       | 533     | 22.3           |                | 392      | 25.5           |                | 141       | 16.5           |                | <b>&lt;.0001</b> |        |
| Surgery          | 72      | 3.0            | 11.8           | 63       | 4.1            | 11.3           | 9         | 1.1            | 17.0           | <b>&lt;.0001</b> | 0.2235 |
| Systemic therapy | 65      | 2.7            | 6.2            | 50       | 3.3            | 6.3            | 15        | 1.8            | 5.8            | <b>0.030</b>     | 0.7589 |
| Radiotherapy     | 16      | 0.7            | 3.2            | 14       | 0.9            | 3.3            | 2         | 0.2            | 3.2            | 0.0511           | 0.9754 |
| Follow-up care   | 172     | 7.2            |                | 107      | 7.0            |                | 65        | 7.6            |                | 0.5721           |        |
| Rehabilitation   | 235     | 9.8            |                | 190      | 12.4           |                | 45        | 5.3            |                | <b>&lt;.0001</b> |        |
| Psychooncology   | 64      | 2.7            |                | 46       | 3.0            |                | 18        | 2.1            |                | 0.1942           |        |
| Nursing care     | 14      | 0.6            |                | 7        | 0.5            |                | 7         | 0.8            |                | 0.2664           |        |

Footnotes: Patients: Cancer patients diagnosed between 07/2019 and 06/2020; Survivors: Cancer survivors diagnosed between 01/2015 and 06/2019. %<sub>a</sub>: percentage in relation to number of participants; %<sub>b</sub>: percentage in relation to planned treatments in this domain (data only available for surgery, systemic and radiotherapy).  $p_a$ : statistical significance of %<sub>a</sub> difference between patients and survivors;  $p_b$ : statistical significance of %<sub>b</sub> difference between patients and survivors. Bold  $p$ -values mark statistically significant differences ( $p < .05$ ).

Table S3. Prevalence of anxiety and depression in cancer patients and survivors, overall and stratified by change of active cancer treatment.

|                                                                    | N    | Subclinical anxiety<br>(HADS-A ≥ 8) |                                |                                | Clinically significant anxiety<br>(HADS-A ≥ 11) |                                |                                | Subclinical depression<br>(HADS-D ≥ 8) |                                |                                | Clinically significant<br>depression (HADS-D ≥ 11) |                                |                                |
|--------------------------------------------------------------------|------|-------------------------------------|--------------------------------|--------------------------------|-------------------------------------------------|--------------------------------|--------------------------------|----------------------------------------|--------------------------------|--------------------------------|----------------------------------------------------|--------------------------------|--------------------------------|
|                                                                    |      | Un-<br>adjusted                     | Adjusted<br>model <sup>c</sup> | Adjusted<br>model <sup>d</sup> | Un-<br>adjusted                                 | Adjusted<br>model <sup>c</sup> | Adjusted<br>model <sup>d</sup> | Un-<br>adjusted                        | Adjusted<br>model <sup>c</sup> | Adjusted<br>model <sup>d</sup> | Un-<br>adjusted                                    | Adjusted<br>model <sup>c</sup> | Adjusted<br>model <sup>d</sup> |
| <b>Overall prevalence</b>                                          | 2391 | 36.9                                |                                |                                | 16.5                                            |                                |                                | 44.9                                   |                                |                                | 19.4                                               |                                |                                |
| <b>Stratified by change of active cancer treatment<sup>a</sup></b> |      |                                     |                                |                                |                                                 |                                |                                |                                        |                                |                                |                                                    |                                |                                |
| <b>None</b>                                                        | 955  | 35.9                                | 37.1                           | 54.7                           | 15.1                                            | 14.4                           | 23.1                           | 41.7                                   | 42.3                           | 63.9                           | 16.2                                               | 15.1                           | 29.1                           |
| <b>As planned<sup>b</sup></b>                                      | 1298 | 36.2                                | 37.4                           | 53.6                           | 16.4                                            | 15.6                           | 22.0                           | 46.2                                   | 45.4                           | 63.3                           | 20.4                                               | 19.0                           | 30.7                           |
| <b>Changed<sup>b</sup></b>                                         | 138  | 50.0                                | 50.5                           | 62.1                           | 26.8                                            | 25.2                           | 29.4                           | 55.8                                   | 55.4                           | 67.7                           | 31.9                                               | 30.0                           | 39.4                           |
| <b>p (contrasts)</b>                                               |      |                                     |                                |                                |                                                 |                                |                                |                                        |                                |                                |                                                    |                                |                                |
| <b>As planned vs. none</b>                                         |      | 0.89                                | 0.88                           | 0.70                           | 0.43                                            | 0.47                           | 0.69                           | <b>0.0361</b>                          | 0.18                           | 0.80                           | <b>0.0107</b>                                      | <b>0.0202</b>                  | 0.56                           |
| <b>Changed vs. as planned</b>                                      |      | <b>0.0016</b>                       | <b>0.0039</b>                  | 0.08                           | <b>0.0024</b>                                   | <b>0.0052</b>                  | 0.09                           | <b>0.0320</b>                          | <b>0.0300</b>                  | 0.32                           | <b>0.0021</b>                                      | <b>0.0026</b>                  | 0.07                           |

Footnotes: <sup>a</sup>Active cancer treatment refers to surgery, systemic or radiotherapy in the time between January 2020 and the survey in 2021, according to self-report or cancer registry. <sup>b</sup>Change refers to self-report of cancellation, postponement or other change of surgery, systemic or radiotherapy due to the COVID-19 pandemic. Treatments and treatment changes in further domains like rehabilitation were not considered in this analysis, as there was no information on the number of planned and executed treatments for these domains. <sup>c</sup>Estimated by logistic regression, adjusted for age at survey, sex, education, tumor site, and stage. <sup>d</sup>Additionally adjusted for survivor status, cancer phase (diagnosis, primary treatment, remission, follow-up care, palliative or unknown), body mass index, previous COVID-19 infection, and contact restrictions to relatives, self-help groups, physicians, caregivers, and in public. Bold p values mark statistically significant subgroup differences ( $p < .05$ ).

Table S4. Odds Ratios and 95% CI for factors explaining anxiety.

|                                                              | Subclinical anxiety<br>(HADS-A ≥ 8) |                           |                           | Anxiety (HADS-A ≥ 11)   |                           |                           |
|--------------------------------------------------------------|-------------------------------------|---------------------------|---------------------------|-------------------------|---------------------------|---------------------------|
|                                                              | Model 1                             | Model 2                   | Model 3                   | Model 1                 | Model 2                   | Model 3                   |
| <b>Active treatment change (ref: as planned)<sup>a</sup></b> |                                     |                           |                           |                         |                           |                           |
| No active treatment planned                                  | 0.99 (0.83-1.18)                    | 0.99 (0.82 - 1.20)        | 1.05 (0.84 - 1.30)        | 0.91 (0.72-1.15)        | 0.91 (0.71 - 1.17)        | 1.06 (0.80 - 1.41)        |
| Active treatment changed                                     | <b>1.76 (1.24-2.51)</b>             | <b>1.71 (1.19 - 2.47)</b> | 1.42 (0.97 - 2.08)        | <b>1.87 (1.25-2.81)</b> | <b>1.82 (1.20 - 2.78)</b> | 1.47 (0.94 - 2.28)        |
| <b>Age at survey (ref: 60-69 years)</b>                      |                                     |                           |                           |                         |                           |                           |
| 18-49 years                                                  | -                                   | <b>2.23 (1.58 - 3.15)</b> | <b>2.24 (1.54 - 3.28)</b> | -                       | <b>2.84 (1.90 - 4.23)</b> | <b>3.09 (1.98 - 4.82)</b> |
| 50-59 years                                                  | -                                   | <b>1.94 (1.52 - 2.47)</b> | <b>1.89 (1.45 - 2.47)</b> | -                       | <b>2.40 (1.78 - 3.24)</b> | <b>2.57 (1.85 - 3.58)</b> |
| 70-79 years                                                  | -                                   | <b>0.74 (0.59 - 0.93)</b> | <b>0.76 (0.60 - 0.97)</b> | -                       | 0.78 (0.57 - 1.06)        | 0.78 (0.56 - 1.08)        |
| 80-86 years                                                  | -                                   | 0.90 (0.66 - 1.22)        | 0.85 (0.61 - 1.19)        | -                       | 0.68 (0.43 - 1.09)        | <b>0.59 (0.36 - 0.98)</b> |
| <b>Cancer site by sex (ref: Colorectal cancer, males)</b>    |                                     |                           |                           |                         |                           |                           |
| Breast cancer                                                | -                                   | 1.25 (0.87 - 1.80)        | 1.19 (0.81 - 1.74)        | -                       | 1.37 (0.82 - 2.27)        | 1.28 (0.75 - 2.18)        |
| Colorectal cancer, females                                   | -                                   | <b>1.81 (1.29 - 2.55)</b> | <b>1.69 (1.18 - 2.43)</b> | -                       | <b>2.06 (1.27 - 3.32)</b> | <b>1.82 (1.10 - 3.02)</b> |
| Leukemia or lymphoma, females                                | -                                   | <b>2.05 (1.38 - 3.05)</b> | <b>1.89 (1.24 - 2.89)</b> | -                       | <b>2.03 (1.18 - 3.50)</b> | <b>1.81 (1.02 - 3.21)</b> |
| Leukemia or lymphoma, males                                  | -                                   | 0.89 (0.59 - 1.33)        | 0.83 (0.54 - 1.27)        | -                       | 1.01 (0.57 - 1.80)        | 0.94 (0.52 - 1.72)        |
| Lung cancer, females                                         | -                                   | <b>2.66 (1.85 - 3.82)</b> | <b>2.35 (1.60 - 3.46)</b> | -                       | <b>3.42 (2.10 - 5.57)</b> | <b>2.75 (1.64 - 4.59)</b> |
| Lung cancer, males                                           | -                                   | <b>1.56 (1.07 - 2.28)</b> | <b>1.58 (1.07 - 2.35)</b> | -                       | <b>1.91 (1.13 - 3.23)</b> | <b>1.79 (1.03 - 3.09)</b> |
| Prostate cancer                                              | -                                   | 1.17 (0.81 - 1.69)        | 1.25 (0.86 - 1.82)        | -                       | 1.18 (0.68 - 2.03)        | 1.24 (0.71 - 2.17)        |
| <b>UICC stage at diagnosis (ref: I)</b>                      |                                     |                           |                           |                         |                           |                           |
| Stage II                                                     | -                                   | 1.02 (0.78 - 1.34)        | 1.04 (0.79 - 1.39)        | -                       | 1.05 (0.73 - 1.49)        | 1.06 (0.73 - 1.53)        |
| Stage III                                                    | -                                   | 0.95 (0.72 - 1.26)        | 0.97 (0.72 - 1.30)        | -                       | 0.85 (0.59 - 1.24)        | 0.80 (0.54 - 1.18)        |
| Stage IV                                                     | -                                   | 0.79 (0.58 - 1.08)        | 0.72 (0.51 - 1.03)        | -                       | 0.72 (0.48 - 1.09)        | <b>0.61 (0.38 - 0.97)</b> |
| <b>Education (ref: 10-11 years)</b>                          |                                     |                           |                           |                         |                           |                           |
| 12 or more years                                             | -                                   | 0.90 (0.72 - 1.12)        | 0.90 (0.72 - 1.13)        | -                       | 0.97 (0.73 - 1.28)        | 0.92 (0.69 - 1.24)        |
| 9 years or less                                              | -                                   | 1.24 (1.00 - 1.54)        | 1.09 (0.86 - 1.38)        | -                       | 1.23 (0.92 - 1.63)        | 1.07 (0.79 - 1.45)        |
| <b>Survivor status: patient (ref: survivor)</b>              | -                                   | -                         | 1.02 (0.83 - 1.25)        | -                       | -                         | 1.22 (0.93 - 1.61)        |
| <b>Treatment phase (ref: diagnosis)</b>                      |                                     |                           |                           |                         |                           |                           |
| Primary                                                      | -                                   | -                         | 0.77 (0.45 - 1.31)        | -                       | -                         | 1.01 (0.49 - 2.08)        |
| Remission                                                    | -                                   | -                         | <b>0.60 (0.36 - 0.99)</b> | -                       | -                         | 0.72 (0.36 - 1.45)        |
| Follow-up                                                    | -                                   | -                         | 0.67 (0.41 - 1.09)        | -                       | -                         | 1.06 (0.55 - 2.03)        |

|                                                        | Subclinical anxiety<br>(HADS-A ≥ 8) |         |                           | Anxiety (HADS-A ≥ 11) |         |                           |
|--------------------------------------------------------|-------------------------------------|---------|---------------------------|-----------------------|---------|---------------------------|
|                                                        | Model 1                             | Model 2 | Model 3                   | Model 1               | Model 2 | Model 3                   |
| Recurrence                                             | -                                   | -       | 1.52 (0.83 - 2.77)        | -                     | -       | 2.07 (0.96 - 4.46)        |
| Palliative                                             | -                                   | -       | 1.14 (0.60 - 2.16)        | -                     | -       | <b>2.34 (1.04 - 5.30)</b> |
| <b>Previous COVID-19 infection (ref: none/ unsure)</b> | -                                   | -       | 1.10 (0.68 - 1.78)        | -                     | -       | 1.23 (0.69 - 2.18)        |
| <b>BMI (ref: normal weight)</b>                        |                                     |         |                           |                       |         |                           |
| Underweight                                            | -                                   | -       | 1.56 (0.86 - 2.84)        | -                     | -       | 1.56 (0.79 - 3.04)        |
| Pre-obesity                                            | -                                   | -       | 0.90 (0.73 - 1.11)        | -                     | -       | 0.93 (0.71 - 1.22)        |
| Obesity                                                | -                                   | -       | 1.08 (0.84 - 1.38)        | -                     | -       | 0.82 (0.59 - 1.13)        |
| <b>Living situation (ref: with partner)</b>            |                                     |         |                           |                       |         |                           |
| Living with others/nursing home                        | -                                   | -       | 0.85 (0.53 - 1.36)        | -                     | -       | 0.80 (0.45 - 1.41)        |
| Living alone, no partner                               | -                                   | -       | 0.92 (0.71 - 1.19)        | -                     | -       | 0.81 (0.58 - 1.14)        |
| <b>Working status (ref: full-time)</b>                 |                                     |         |                           |                       |         |                           |
| Retired/ not employed                                  | -                                   | -       | 0.95 (0.71 - 1.27)        | -                     | -       | 1.31 (0.91 - 1.90)        |
| Part-time                                              | -                                   | -       | 0.94 (0.69 - 1.27)        | -                     | -       | 1.03 (0.70 - 1.52)        |
| <b>Low income (ref: average or high)</b>               | -                                   | -       | <b>1.78 (1.41 - 2.24)</b> | -                     | -       | <b>1.71 (1.28 - 2.28)</b> |
| <b>Contact restrictions (ref per domain: none)</b>     |                                     |         |                           |                       |         |                           |
| ...to relatives                                        | -                                   | -       | 1.27 (0.99 - 1.63)        | -                     | -       | 1.22 (0.87 - 1.71)        |
| ...to peer support groups                              | -                                   | -       | <b>1.35 (1.10 - 1.67)</b> | -                     | -       | 1.31 (1.00 - 1.71)        |
| ...to physicians                                       | -                                   | -       | <b>1.90 (1.42 - 2.53)</b> | -                     | -       | <b>1.84 (1.31 - 2.58)</b> |
| ...to caregivers                                       | -                                   | -       | 1.31 (0.98 - 1.75)        | -                     | -       | <b>1.54 (1.09 - 2.19)</b> |
| ...in public                                           | -                                   | -       | 1.21 (0.89 - 1.64)        | -                     | -       | 1.20 (0.78 - 1.84)        |

Footnotes: <sup>a</sup>Active cancer treatment refers to surgery, systemic or radiotherapy in the time between January 2020 and the survey in 2021, according to self-report or cancer registry. Change refers to self-report of cancellation, postponement or other change of surgery, systemic or radiotherapy due to the COVID-19 pandemic. Treatments and treatment changes in further domains like rehabilitation were not considered in this analysis, as there was no information on the number of planned and executed treatments for these domains. All results were estimated with hierarchical logistic regression. Bold Odds Ratios mark statistically significant factors (confidence interval not including 1).

Table S5. Odds Ratios and 95% CI for factors explaining depression.

|                                                              | Subclinical depression<br>(HADS-D ≥ 8) |                           |                           | Depression (HADS-D ≥ 11) |                           |                           |
|--------------------------------------------------------------|----------------------------------------|---------------------------|---------------------------|--------------------------|---------------------------|---------------------------|
|                                                              | Model 1                                | Model 2                   | Model 3                   | Model 1                  | Model 2                   | Model 3                   |
| <b>Active treatment change (ref: as planned)<sup>a</sup></b> |                                        |                           |                           |                          |                           |                           |
| No active treatment planned                                  | <b>0.83 (0.70-0.99)</b>                | 0.89 (0.74 - 1.06)        | 1.03 (0.83 - 1.27)        | <b>0.75 (0.60-0.93)</b>  | <b>0.76 (0.61 - 0.96)</b> | 0.93 (0.71 - 1.21)        |
| Active treatment changed                                     | <b>1.47 (1.03-2.10)</b>                | <b>1.50 (1.04 - 2.15)</b> | 1.22 (0.83 - 1.79)        | <b>1.82 (1.24-2.67)</b>  | <b>1.83 (1.24 - 2.70)</b> | 1.47 (0.97 - 2.22)        |
| <b>Age at survey (ref: 60-69 years)</b>                      |                                        |                           |                           |                          |                           |                           |
| 18-49 years                                                  | -                                      | 1.07 (0.76 - 1.50)        | 1.05 (0.72 - 1.54)        | -                        | 0.97 (0.62 - 1.52)        | 1.07 (0.65 - 1.74)        |
| 50-59 years                                                  | -                                      | 1.18 (0.92 - 1.50)        | 1.24 (0.95 - 1.61)        | -                        | <b>1.51 (1.13 - 2.02)</b> | <b>1.72 (1.24 - 2.38)</b> |
| 70-79 years                                                  | -                                      | 0.85 (0.69 - 1.05)        | 0.83 (0.66 - 1.04)        | -                        | 0.98 (0.75 - 1.28)        | 0.92 (0.69 - 1.23)        |
| 80-86 years                                                  | -                                      | 1.17 (0.87 - 1.57)        | 1.03 (0.74 - 1.42)        | -                        | <b>1.45 (1.01 - 2.08)</b> | 1.14 (0.77 - 1.68)        |
| <b>Cancer site by sex (ref: Colorectal cancer, males)</b>    |                                        |                           |                           |                          |                           |                           |
| Breast cancer                                                | -                                      | 1.08 (0.77 - 1.52)        | 1.03 (0.71 - 1.48)        | -                        | 0.73 (0.47 - 1.15)        | 0.64 (0.40 - 1.02)        |
| Colorectal cancer, females                                   | -                                      | 1.20 (0.87 - 1.66)        | 1.07 (0.76 - 1.52)        | -                        | 0.96 (0.64 - 1.45)        | 0.75 (0.48 - 1.17)        |
| Leukemia or lymphoma, females                                | -                                      | <b>1.71 (1.17 - 2.50)</b> | <b>1.52 (1.02 - 2.28)</b> | -                        | 1.44 (0.90 - 2.29)        | 1.19 (0.72 - 1.96)        |
| Leukemia or lymphoma, males                                  | -                                      | 1.16 (0.79 - 1.69)        | 1.13 (0.76 - 1.68)        | -                        | 0.91 (0.56 - 1.49)        | 0.91 (0.54 - 1.52)        |
| Lung cancer, females                                         | -                                      | <b>2.45 (1.73 - 3.47)</b> | <b>2.07 (1.43 - 3.00)</b> | -                        | <b>1.72 (1.14 - 2.59)</b> | 1.22 (0.79 - 1.90)        |
| Lung cancer, males                                           | -                                      | <b>2.13 (1.50 - 3.03)</b> | <b>2.20 (1.52 - 3.19)</b> | -                        | <b>1.61 (1.06 - 2.45)</b> | 1.55 (1.00 - 2.40)        |
| Prostate cancer                                              | -                                      | 0.80 (0.57 - 1.13)        | 0.87 (0.61 - 1.24)        | -                        | 0.57 (0.36 - 0.91)        | 0.61 (0.38 - 1.00)        |
| <b>UICC stage at diagnosis (ref: I)</b>                      |                                        |                           |                           |                          |                           |                           |
| Stage II                                                     | -                                      | 1.05 (0.81 - 1.37)        | 1.07 (0.81 - 1.41)        | -                        | 1.06 (0.75 - 1.50)        | 1.10 (0.77 - 1.58)        |
| Stage III                                                    | -                                      | 0.94 (0.72 - 1.24)        | 0.92 (0.69 - 1.23)        | -                        | 1.01 (0.71 - 1.43)        | 0.99 (0.69 - 1.43)        |
| Stage IV                                                     | -                                      | 1.23 (0.91 - 1.66)        | 1.00 (0.71 - 1.40)        | -                        | 1.09 (0.76 - 1.58)        | 0.94 (0.62 - 1.43)        |
| <b>Education (ref: 10-11 years)</b>                          |                                        |                           |                           |                          |                           |                           |
| 12 or more years                                             | -                                      | 0.81 (0.66 - 1.00)        | <b>0.80 (0.64 - 0.99)</b> | -                        | 0.79 (0.60 - 1.03)        | 0.77 (0.58 - 1.02)        |
| 9 years or less                                              | -                                      | 1.22 (0.99 - 1.51)        | 1.09 (0.87 - 1.37)        | -                        | 1.05 (0.81 - 1.35)        | 0.88 (0.67 - 1.16)        |
| <b>Survivor status: patient (ref: survivor)</b>              | -                                      | -                         | 1.12 (0.92 - 1.36)        | -                        | -                         | 1.28 (0.99 - 1.64)        |
| <b>Treatment phase (ref: diagnosis)</b>                      |                                        |                           |                           |                          |                           |                           |
| Primary                                                      | -                                      | -                         | 1.43 (0.84 - 2.42)        | -                        | -                         | 1.64 (0.81 - 3.32)        |
| Remission                                                    | -                                      | -                         | 0.95 (0.58 - 1.56)        | -                        | -                         | 1.14 (0.58 - 2.26)        |
| Follow-up                                                    | -                                      | -                         | 1.12 (0.70 - 1.81)        | -                        | -                         | 1.43 (0.75 - 2.75)        |

|                                                        | Subclinical depression<br>(HADS-D ≥ 8) |         |                           | Depression (HADS-D ≥ 11) |         |                           |
|--------------------------------------------------------|----------------------------------------|---------|---------------------------|--------------------------|---------|---------------------------|
|                                                        | Model 1                                | Model 2 | Model 3                   | Model 1                  | Model 2 | Model 3                   |
| Recurrence                                             | -                                      | -       | <b>3.09 (1.67 - 5.69)</b> | -                        | -       | <b>2.91 (1.37 - 6.18)</b> |
| Palliative                                             | -                                      | -       | <b>3.61 (1.87 - 7.00)</b> | -                        | -       | <b>3.54 (1.61 - 7.78)</b> |
| <b>Previous COVID-19 infection (ref: none/ unsure)</b> | -                                      | -       | 1.13 (0.70 - 1.80)        | -                        | -       | 1.17 (0.67 - 2.04)        |
| <b>BMI (ref: normal weight)</b>                        |                                        |         |                           |                          |         |                           |
| Underweight                                            | -                                      | -       | 1.53 (0.83 - 2.80)        | -                        | -       | 1.82 (0.97 - 3.43)        |
| Pre-obesity                                            | -                                      | -       | 1.04 (0.85 - 1.27)        | -                        | -       | 0.89 (0.69 - 1.14)        |
| Obesity                                                | -                                      | -       | 1.03 (0.81 - 1.31)        | -                        | -       | 0.88 (0.65 - 1.18)        |
| <b>Living situation (ref: with partner)</b>            |                                        |         |                           |                          |         |                           |
| Living with others/nursing home                        | -                                      | -       | 1.31 (0.81 - 2.11)        | -                        | -       | 1.01 (0.57 - 1.77)        |
| Living alone, no partner                               | -                                      | -       | <b>1.31 (1.02 - 1.68)</b> | -                        | -       | <b>1.65 (1.24 - 2.21)</b> |
| <b>Working status (ref: full-time)</b>                 |                                        |         |                           |                          |         |                           |
| Retired/ not employed                                  | -                                      | -       | 1.31 (0.98 - 1.73)        | -                        | -       | <b>1.60 (1.11 - 2.32)</b> |
| Part-time                                              | -                                      | -       | 1.05 (0.77 - 1.41)        | -                        | -       | 1.07 (0.71 - 1.60)        |
| <b>Low income (ref: average or high)</b>               | -                                      | -       | <b>1.54 (1.23 - 1.94)</b> | -                        | -       | <b>1.58 (1.22 - 2.06)</b> |
| <b>Contact restrictions (ref per domain: none)</b>     |                                        |         |                           |                          |         |                           |
| ...to relatives                                        | -                                      | -       | <b>1.45 (1.14 - 1.85)</b> | -                        | -       | <b>1.50 (1.10 - 2.05)</b> |
| ...to peer support groups                              | -                                      | -       | 1.23 (1.00 - 1.51)        | -                        | -       | 1.19 (0.93 - 1.54)        |
| ...to physicians                                       | -                                      | -       | <b>1.80 (1.34 - 2.41)</b> | -                        | -       | <b>1.46 (1.05 - 2.03)</b> |
| ...to caregivers                                       | -                                      | -       | <b>1.53 (1.14 - 2.05)</b> | -                        | -       | <b>2.07 (1.49 - 2.87)</b> |
| ...in public                                           | -                                      | -       | 1.17 (0.87 - 1.56)        | -                        | -       | 0.73 (0.51 - 1.05)        |

Footnotes: <sup>a</sup>Active cancer treatment refers to surgery, systemic or radiotherapy in the time between January 2020 and the survey in 2021, according to self-report or cancer registry. Change refers to self-report of cancellation, postponement or other change of surgery, systemic or radiotherapy due to the COVID-19 pandemic. Treatments and treatment changes in further domains like rehabilitation were not considered in this analysis, as there was no information on the number of planned and executed treatments for these domains. All results were estimated with hierarchical logistic regression. Bold Odds Ratios mark statistically significant factors (confidence interval not including 1).



Table S6. Prevalence of anxiety and depression in cancer patients and survivors with a change in active cancer treatment, stratified by decision-maker, domain of change, and reason for change.

|                                     |                              | N   | Subclinical anxiety<br>(HADS-A ≥ 8) | Clinically significant<br>anxiety<br>(HADS-A ≥ 11) | Subclinical<br>depression<br>(HADS-D ≥ 8) | Clinically significant<br>depression<br>(HADS-D ≥ 11) |
|-------------------------------------|------------------------------|-----|-------------------------------------|----------------------------------------------------|-------------------------------------------|-------------------------------------------------------|
| <b>Any change<sup>a</sup></b>       |                              | 138 | 50.0                                | 26.8                                               | 55.8                                      | 31.9                                                  |
| <b>Stratified by decision-maker</b> | No information               | 26  | 57.7                                | 38.5                                               | 57.7                                      | 46.2                                                  |
|                                     | Only own decision(s)         | 9   | 66.7                                | 33.3                                               | 55.6                                      | 44.4                                                  |
|                                     | Only physician's decision(s) | 77  | 39.0                                | 16.9                                               | 53.3                                      | 27.3                                                  |
|                                     | Shared decision(s)           | 26  | 69.2                                | 42.3                                               | 61.5                                      | 26.9                                                  |
|                                     | <i>p</i> ( $\chi^2$ )        |     | <b>0.0266</b>                       | <b>0.0287</b>                                      | 0.90                                      | 0.25                                                  |
| <b>Change of surgery</b>            |                              | 72  | 55.6                                | 29.2                                               | 62.5                                      | 37.5                                                  |
| <b>Stratified by reason</b>         | Infection risk               | 18  | 72.2                                | 27.8                                               | 72.2                                      | 44.4                                                  |
|                                     | Lack of capacities           | 41  | 53.7                                | 31.7                                               | 58.5                                      | 36.6                                                  |
|                                     | Other or unknown reason      | 13  | 38.5                                | 23.1                                               | 61.5                                      | 30.8                                                  |
|                                     | <i>p</i> ( $\chi^2$ )        |     | 0.16                                | 0.83                                               | 0.60                                      | 0.73                                                  |
| <b>Change of systemic therapy</b>   |                              | 65  | 44.6                                | 26.2                                               | 50.8                                      | 26.2                                                  |
| <b>Stratified by reason</b>         | Infection risk               | 20  | 50.0                                | 25.0                                               | 40.0                                      | 30.0                                                  |
|                                     | Lack of capacities           | 11  | 27.3                                | 18.2                                               | 54.6                                      | 9.1                                                   |
|                                     | Other or unknown reason      | 34  | 47.1                                | 29.4                                               | 55.9                                      | 29.4                                                  |
|                                     | <i>p</i> ( $\chi^2$ )        |     | 0.44                                | 0.75                                               | 0.51                                      | 0.37                                                  |
| <b>Change of radiotherapy</b>       |                              | 16  | 56.3                                | 31.3                                               | 37.5                                      | 25.0                                                  |
| <b>Stratified by reason</b>         | Infection risk               | 5   | 80.0                                | 60.0                                               | 60.0                                      | 40.0                                                  |
|                                     | Lack of capacities           | 3   | 66.7                                | 33.3                                               | 33.3                                      | 0.0                                                   |
|                                     | Other or unknown reason      | 8   | 37.5                                | 12.5                                               | 25.0                                      | 25.0                                                  |
|                                     | <i>p</i> ( $\chi^2$ )        |     | 0.30                                | 0.20                                               | 0.44                                      | 0.45                                                  |

Footnotes: <sup>a</sup>Change refers to self-report of cancellation, postponement or other change of surgery, systemic or radiotherapy due to the COVID-19 pandemic. Treatment changes in further domains like rehabilitation were not considered in this analysis. Bold *p* values mark statistically significant differences ( $p < .05$ ) between decision-makers or reasons in global comparison according to chi-square tests.

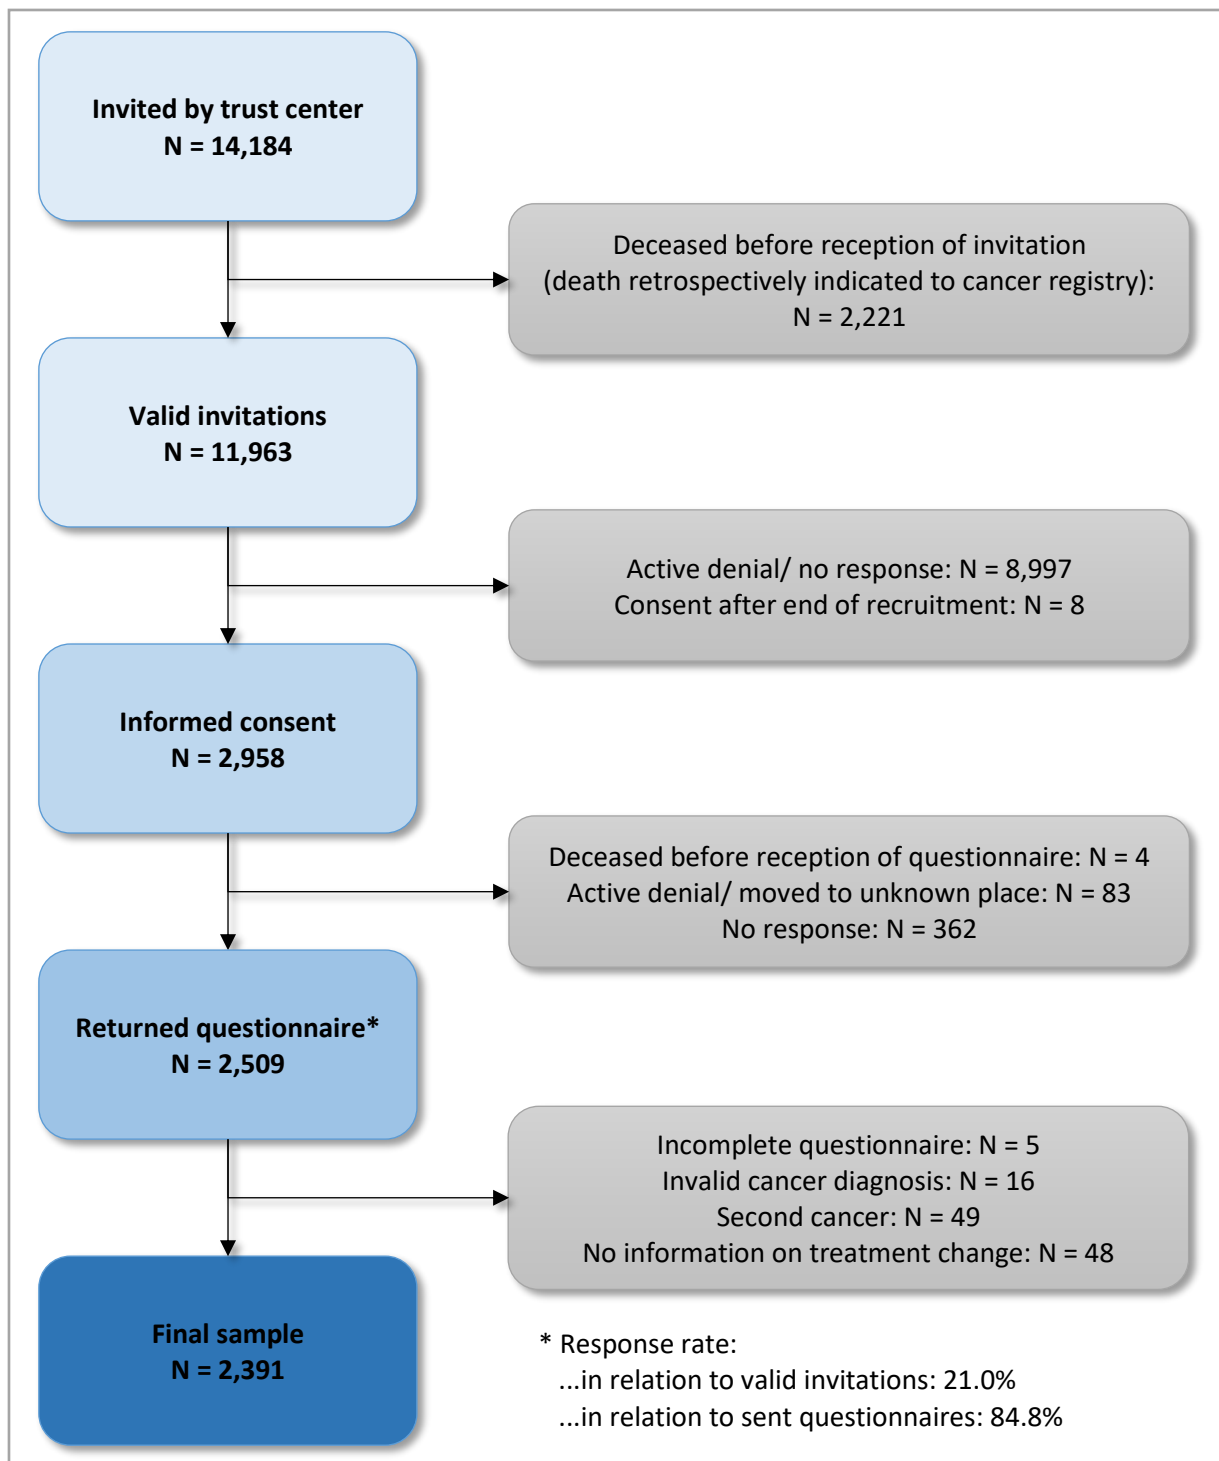

Figure S1. Flowchart of the study.

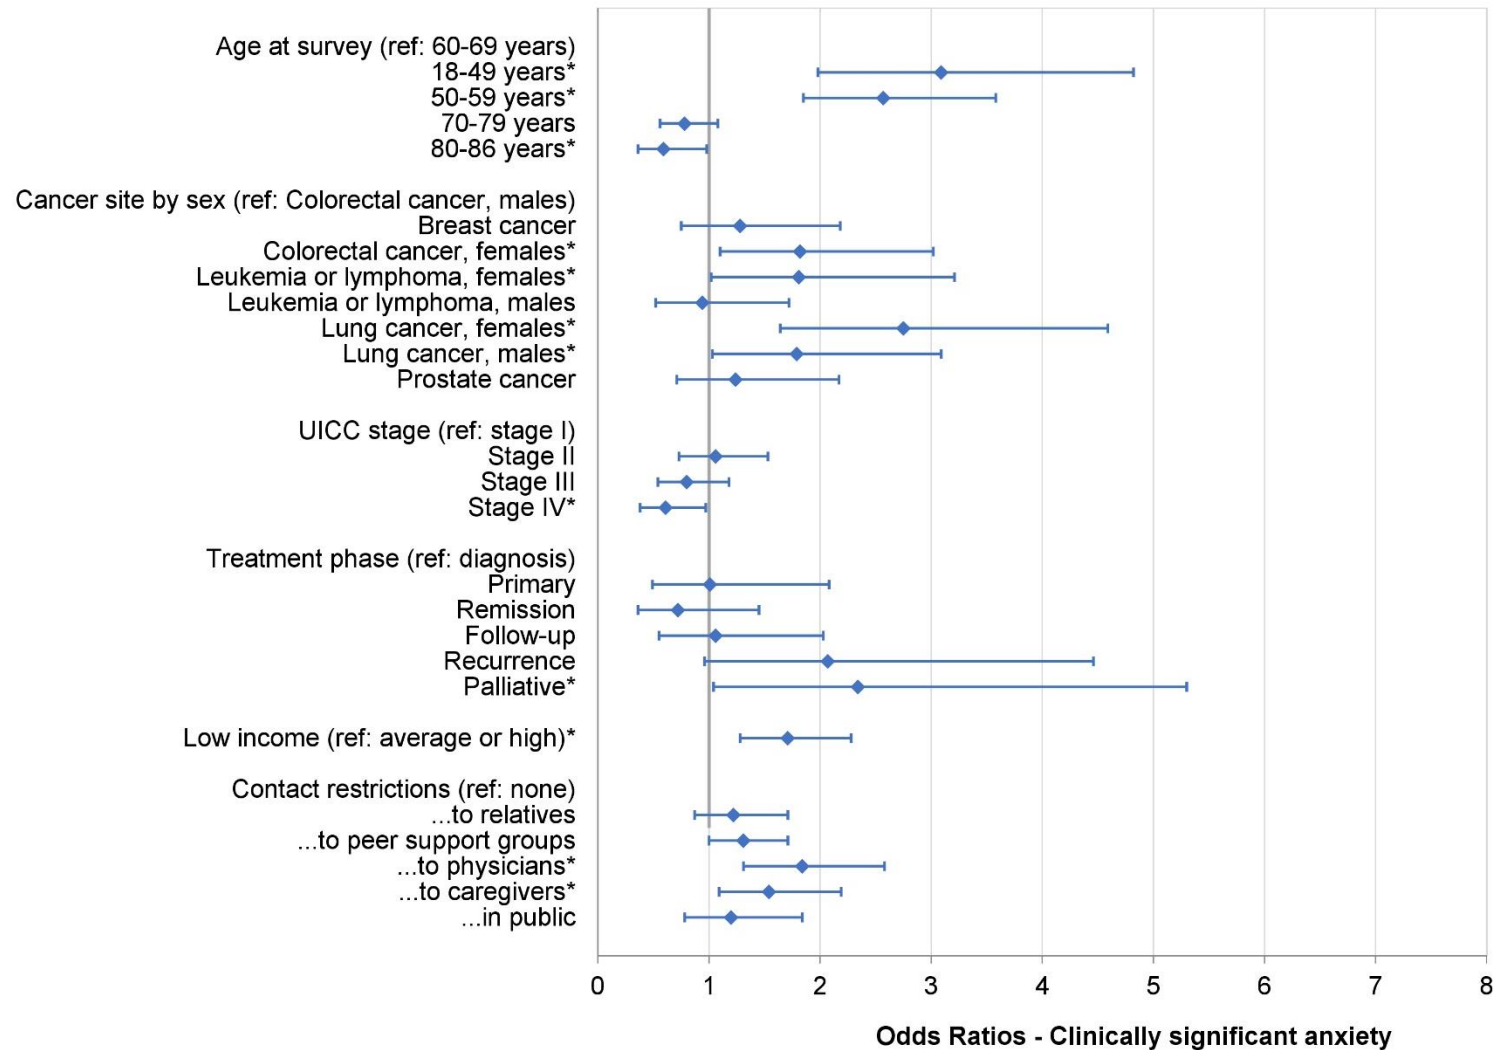

Figure S2. Odds ratios for anxiety (HADS-A cut-off  $\geq 11$ ).

Note: Asterisks (\*) reflect statistically significant factors in the overall model. Further non-significant factors in the model were: Treatment change, employment, education, living situation, patient vs. survivor, previous COVID-19 infection, BMI (data not shown). All results are based on 25 imputations of missing values in the non-conditional variables.

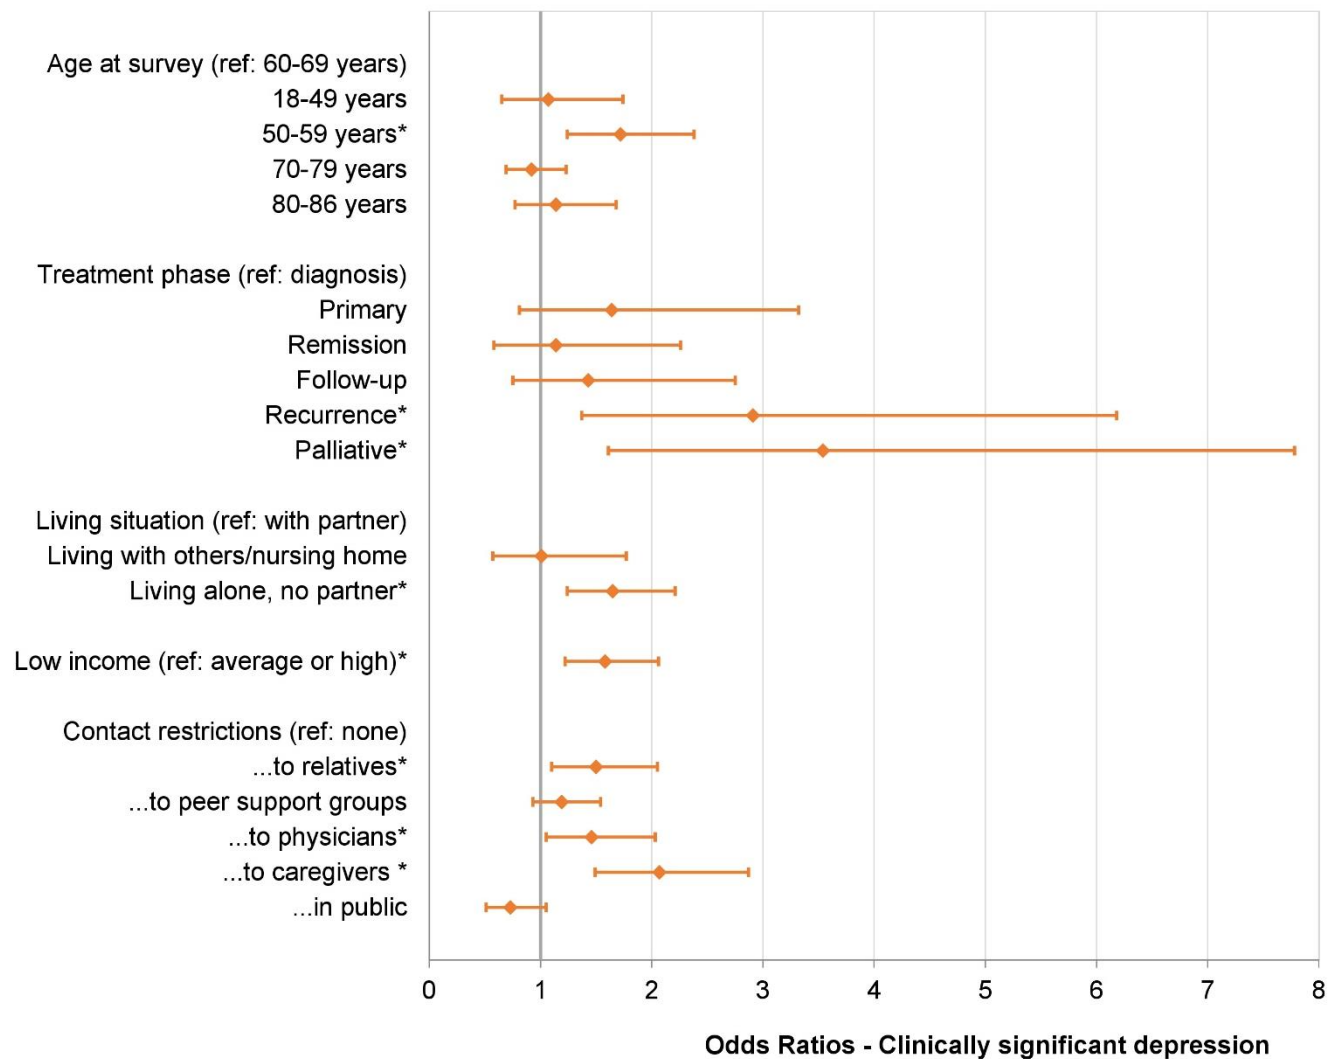

Figure S3. Odds ratios for depression (HADS-D cut-off  $\geq 11$ ).

Note: Asterisks (\*) reflect statistically significant factors in the overall model. Further non-significant factors in the model were: Treatment change, cancer site/sex, employment, stage, patient vs. survivor, previous COVID-19 infection, BMI (data not shown). All results are based on 25 imputations of missing values in the non-conditional variables.
